# Supplementary material for: CO 2 assisted geo-polymerization: a win-win pragmatic approach for the synthesis of soda ash leading to reversal of the climate clock
Source: Royal Society of Chemistry journal article supplement (doi:10.1039/d4su00541d), 2024-01-01
Supplement: d4su00541d1.pdf [file d4su00541d1.pdf]

## CO<sub>2</sub> assisted geo-polymerization: a win-win pragmatic approach for the synthesis of soda ash leading to reversal of climate clock

Sandeep Gupta\*

Research and Development in Construction Chemicals  
CO<sub>2</sub> & Waste Utilized Building Materials/Nanomaterials,  
Room No. 226/228,  
Building Materials and Environmental Sustainability Division  
CSIR-Central Building Research Institute,  
Ministry of Science & Technology, Govt. of India  
Roorkee-247667, Uttarakhand, India.  
Mo.+91-8853080464  
Email: [sandeep@cbri.res.in](mailto:sandeep@cbri.res.in), [sdg.chem@gmail.com](mailto:sdg.chem@gmail.com)

### Supplementary Information

#### (Scheme, S1)

The exact composition data, formulation and steps involved in the procedure have been presented below for the reproducibility of the experiments in research, to promote and reuse of new findings.

The raw fly ash used in our proof of concept experimentations and its compositions are as follows:

| Sr.No. | Composition of fly ash                           | Class C Fly Ash | Class F Fly Ash |
|--------|--------------------------------------------------|-----------------|-----------------|
| 1.     | Silicon Dioxide (SiO <sub>2</sub> )              | 47-58%          | 50-65%          |
| 2.     | Aluminum Oxide (Al <sub>2</sub> O <sub>3</sub> ) | 15-23%          | 20-30%          |
| 3.     | Iron Oxide (Fe <sub>2</sub> O <sub>3</sub> )     | 5-8%            | 4-7%            |
| 4.     | Calcium Oxide (CaO)                              | 15-35%          | 1-8%            |
| 5.     | Magnesium Oxide (MgO)                            | 1-4%            | 0.5-4%          |
| 6.     | Sulfur Trioxide (SO <sub>3</sub> )               | 1-4%            | <1.5%           |
| 7.     | Loss on Ignition (LOI)                           | 0.5-6%          | 0.5-5%          |
| 8.     | Potassium Oxide (K <sub>2</sub> O)               | 0.5-3%          | 0.5-2%          |
| 9.     | Sodium Oxide (Na <sub>2</sub> O)                 | 0.1-2%          | 0.1-2%          |
| 10.    | Titanium Dioxide (TiO <sub>2</sub> )             | 1-2%            | 0.5-2%          |

The ratio of making fly ash paste specimens with variable ratio of ingredients:

| Ingredients        | Ash | sodium silicate | Carbonation duration | Relative humidity | Silica modulus (silica to alumina) | Sodium hydroxide | Plasticizing agent (glycerol) |
|--------------------|-----|-----------------|----------------------|-------------------|------------------------------------|------------------|-------------------------------|
| Trial ratio CASP-1 | 85% | 9%              | 8 hrs                | 40%               | 0.7                                | 0%               | 4%                            |
| Trial ratio CASP-2 | 85% | 9%              | 10 hrs               | 45%               | 0.9                                | 0%               | 4%                            |
| Trial ratio CASP-3 | 85% | 10%             | 12 hrs               | 55%               | 1.1                                | 0%               | 4%                            |
| Trial ratio CASP-4 | 85% | 12%             | 15 hrs               | 55%               | 1.3                                | 0%               | 4%                            |

Outcomes (percentage yield of the soda ash and mechanical parameters) for trials

| Sample name        | Percentage yield of soda ash | Strength of block synthesized and water absorption |
|--------------------|------------------------------|----------------------------------------------------|
| Trial ratio CASP-1 | 24%                          | 8 Mpa, 18%                                         |
| Trial ratio CASP-2 | 27%                          | 10 Mpa, 16%                                        |
| Trial ratio CASP-3 | 31 %                         | 14 Mpa, 13 %                                       |
| Trial ratio CASP-4 | 33 %                         | 16 Mpa, 12 %                                       |

The sample preparation steps are as follows:

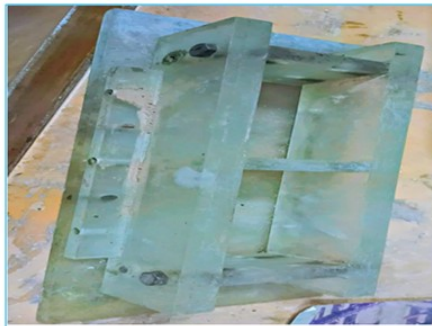

Empty Mold

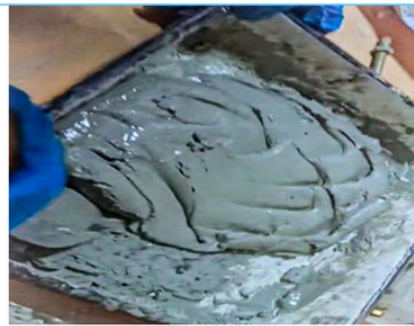

Making and filling of fly ash paste

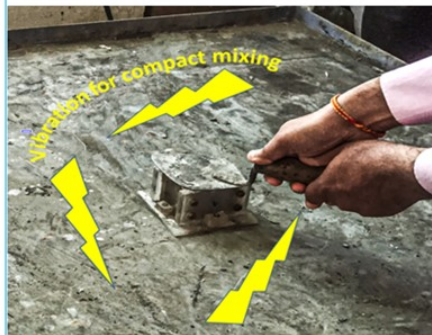

Homogenize and compaction through vibration

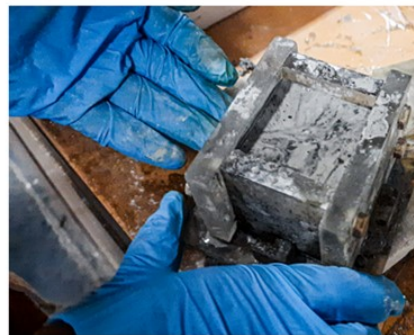

Ready sample for keeping in carbonation chamber
